# Supplementary material for: Preliminary Experimental Results and Modelling Study of Olive Kernel Gasification in a 2 MWth BFB Gasifier
Source: MDPI journal article supplement (doi:10.3390/pr10102020), 2022-10-07
Supplement: s1 [file s1]

**Supplementary Materials:** The following supporting information can be downloaded at: [www.mdpi.com/xxx/s1](http://www.mdpi.com/xxx/s1), Figure S1: Particle size distribution of the as-received olive kernel for particles smaller (a) and larger (b) than 3.15 mm, Table S1: Composition and physicochemical properties of the bauxite used as bed material in the experiments, Table S2: Results of relevant studies exploring gasification of olive pits/kernels and typical woody biomass.

26. Vera, D.; De Mena, B.; Jurado, F.; Schories, G. Study of a downdraft gasifier and gas engine fueled with olive oil industry wastes. *Appl. Therm. Eng.* **2013**, *51*, 119–129, doi:10.1016/j.applthermaleng.2012.09.012.

28. Vera, D.; Jurado, F.; Margaritis, N.K.; Grammelis, P. Experimental and economic study of a gasification plant fuelled with olive industry wastes. *Energy Sustain. Dev.* **2014**, *23*, 247–257, doi:10.1016/j.esd.2014.09.011.

29. Manara, P.; Zabaniotou, A. Indicator-based economic, environmental, and social sustainability assessment of a small gasification bioenergy system fuelled with food processing residues from the Mediterranean agro-industrial sector. *Sustain. Energy Technol. Assessments* **2014**, *8*, 159–171, doi:10.1016/j.seta.2014.08.007.

38. Bandara, J.C.; Jaiswal, R.; Nielsen, H.K.; Moldestad, B.M.E.; Eikeland, M.S. Air gasification of wood chips, wood pellets and grass pellets in a bubbling fluidized bed reactor. *Energy* **2021**, *233*, 121149, doi:10.1016/j.energy.2021.121149.

43. Sarker, S.; Bimbela, F.; Sánchez, J.L.; Nielsen, H.K. Characterization and pilot scale fluidized bed gasification of herbaceous biomass: A case study on alfalfa pellets. *Energy Convers. Manag.* **2015**, *91*, 451–458, doi:10.1016/j.enconman.2014.12.034.

# Preliminary Experimental Results and Modelling Study of Olive Kernel Gasification in a 2 MWth BFB Gasifier

Athanasios Lampropoulos <sup>1,\*</sup>, Idoia Goñi Zubillaga <sup>2</sup>, Raúl Pérez-Vega <sup>2</sup>, Nikolaos Ntavos <sup>3</sup>,  
Yannis Fallas <sup>3</sup> and Georgios Varvoutis <sup>1,\*</sup>

<sup>1</sup> Department of Mechanical Engineering, University of Western Macedonia, 50100 Kozani, Greece

<sup>2</sup> Biomass Department, National Renewable Energy Centre (CENER), 31621 Sarriguren, Spain

<sup>3</sup> Cluster of Bioeconomy and Environment of Western Macedonia, 50100 Kozani, Greece

\* Correspondence: alabropoulos@uowm.gr (A.L.); gvarvoutis@uowm.gr (G.V.)

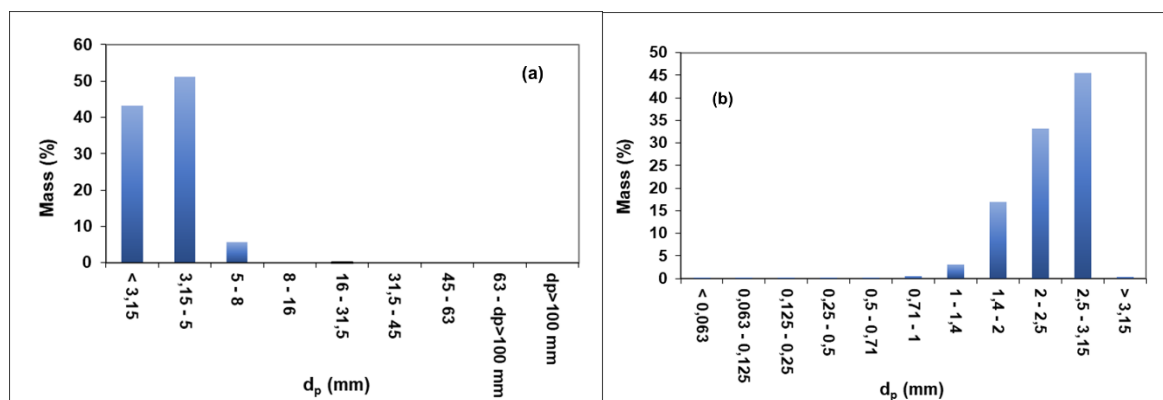

**Figure S1.** Particle size distribution of the as-received olive kernel for particles smaller (a) and larger (b) than 3.15 mm.

**Table S1.** Composition and physicochemical properties of the bauxite used as bed material in the experiments.

| Composition                    |                   |
|--------------------------------|-------------------|
| Compound                       | Mass fraction (%) |
| SiO <sub>2</sub>               | 6.50              |
| Al <sub>2</sub> O <sub>3</sub> | 88.50             |
| Fe <sub>2</sub> O <sub>3</sub> | 1.10              |
| TiO <sub>2</sub>               | 3.00              |
| MgO                            | 0.02              |
| CaO                            | 0.02              |

|                                       |           |
|---------------------------------------|-----------|
| Na <sub>2</sub> O                     | 0.02      |
| K <sub>2</sub> O                      | 0.03      |
| <b>Physicochemical properties</b>     |           |
| Apparent density (g/cm <sup>3</sup> ) | 3.15      |
| Apparent porosity (%)                 | 12.0      |
| Granulometry (mm)                     | 0.2 - 0.5 |
| Minimum fluidization velocity         | 0.17      |

**Table S2.** Results of relevant studies exploring gasification of olive pits/kernels and typical woody biomass.

| Feed                    | Olive pit   | Olive kernel | Olive kernel              | Woody biomass                   | Olive kernel     |
|-------------------------|-------------|--------------|---------------------------|---------------------------------|------------------|
| Reference               | [26,28]     | [26,28]      | 29                        | [38,43]                         | <i>This work</i> |
| Reactor type            | Downdraft   | Downdraft    | BFB <sup>a</sup>          | <sup>b</sup>                    | BFB              |
| Power (kW)              | 460         | 500          | 5                         | 5 - 1,000                       | 2,000            |
| E.R.                    | 0.3         | 0.2 - 0.3    | 0.3                       | 0.2 - 0.3                       | 0.3              |
| H <sub>2</sub> (vol.%)  | 16.0        | 16.8         | 14.3                      | 13 - 17                         | 13.5             |
| CO (vol.%)              | 22.8        | 21.6         | 16.1                      | 12 - 18                         | 17.1             |
| CO <sub>2</sub> (vol.%) | 5.10        | 11.6         | 18.2                      | 13 - 17                         | 18.9             |
| CH <sub>4</sub> (vol.%) | 3.4         | 3.1          | 3.8                       | 3 - 5                           | 4.2              |
| LHV (d.b.)              | 5.5 (MJ/kg) | 5.1 (MJ/kg)  | 4.0 (MJ/Nm <sup>3</sup> ) | 4.7 - 5.7 (MJ/Nm <sup>3</sup> ) | 5.0 (MJ/kg)      |

<sup>a</sup> olivine and limestone as bed materials, <sup>b</sup> depending on feedstock
